# Supplementary material
Source: publisher figshare collection journal article supplement (https://frontiersin.figshare.com/ndownloader/files/15103499)
Supplement: Supplementary file 1 [file 15103499]

### Supplementary Information

Chemical and isotopic evidence for organic matter sulfurization in redox gradients around mangrove roots

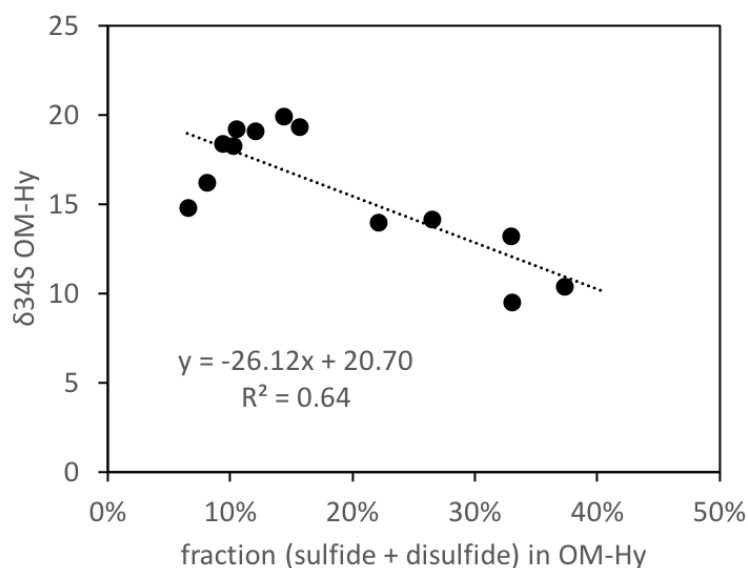

**Supplementary Figure 1.** Relationship between the relative abundance of (di)sulfides in hydrolyzable OM (OM<sub>Hy</sub>) and the S-isotope composition of this pool. Linear regression shows a moderately strong correlation ( $R=0.64$ ) between these data, indicating a potential mixing relationship between oxidized forms of OS<sub>Hy</sub> with a  $\delta^{34}\text{S}$  value near 20.7‰ and (di)sulfides with a more  $^{34}\text{S}$ -depleted composition.
